# Supplementary material for: Critical Conditions Identification for Online Purchase Intention of Fruits: A Fuzzy-Set Qualitative Comparative Analysis
Source: Front Psychol. 2021 Dec 2;12:713295. doi: 10.3389/fpsyg.2021.713295 (PMC8675030; doi:10.3389/fpsyg.2021.713295)
Supplement: Supplementary file 1 [file Table_1.XLSX]

## Sheet: Sheet1
序号	Q1	Q2	Q3	Q4	Q5	Q6	Q7	Q9	Q10	Q11	Q12	Q13	Q14	Q15	Q16	Q17	Q18	Q19	Q20	Q21	Q22	Q23	Q24	Q25	Q26	Q27
1	2	4	1	-2	1	1	1	5	4	4	4	4	4	5	5	5	4	4	4	4	4	4	5	5	7	7
2	2	4	1	-2	1	1	1	4	4	4	4	4	4	5	5	4	4	4	4	5	4	4	5	5	7	7
3	2	4	2	-2	2	1	2	3	2	2	3	3	4	4	4	2	3	3	2	3	3	5	4	5	6	6
4	2	4	2	2	3	1	1	6	6	6	5	5	4	5	5	5	5	4	2	4	4	4	6	6	5	4
5	2	4	1	-2	3	1	1	6	4	4	3	4	3	6	7	5	5	4	3	5	5	4	6	6	5	6
6	3	4	1	5	5	2	2	4	4	5	3	2	2	5	5	5	7	1	6	5	5	5	5	5	5	4
7	3	4	1	3	5	2	1	4	4	4	5	4	6	5	6	6	6	6	7	6	5	6	6	6	4	5
8	4	5	1	3	-2	4	2	5	5	4	4	4	5	5	5	5	5	4	4	6	6	6	6	6	5	5
9	2	4	1	1	2	1	2	6	4	5	5	5	3	5	6	5	6	6	3	6	6	6	6	3	6	6
10	3	5	1	-2	5	1	2	6	5	5	5	5	4	4	5	5	5	5	3	5	5	5	6	7	5	3
11	4	4	2	3	5	4	1	6	6	6	6	6	6	6	6	6	6	6	6	6	6	6	6	6	6	6
12	2	3	1	3	-2	2	1	6	4	4	4	4	4	4	4	4	4	4	3	4	3	4	7	7	6	6
13	2	3	2	3	3	1	1	4	4	4	3	4	3	4	6	4	6	5	3	3	4	3	6	4	6	6
14	2	3	1	5	2	1	2	3	2	2	2	2	4	3	1	6	3	3	3	4	3	4	5	6	5	6
15	2	3	1	1	2	1	2	4	4	4	7	7	4	4	6	6	6	6	4	4	4	5	6	2	6	2
16	2	4	2	-2	2	1	2	6	4	4	3	3	3	3	3	3	5	5	3	3	3	3	6	6	6	6
17	2	3	1	1	2	1	2	4	3	1	1	4	3	1	2	3	2	3	1	6	4	4	5	6	3	4
18	2	3	2	2	3	2	2	6	4	4	5	3	4	6	7	4	5	4	2	4	4	4	6	6	6	6
19	2	3	1	3	2	1	2	3	2	3	3	4	4	4	5	4	4	5	4	5	5	4	4	5	6	6
20	4	3	2	2	4	2	1	4	3	2	3	3	3	2	4	3	4	4	5	5	5	5	6	6	6	6
21	4	5	1	3	-2	4	1	7	6	6	5	7	4	5	6	6	6	6	1	5	4	5	6	6	3	4
22	2	4	2	-2	2	1	2	4	4	5	5	4	5	3	4	4	4	4	3	5	4	4	5	5	4	4
23	4	4	2	3	5	5	1	4	4	2	3	4	4	3	4	3	4	4	4	4	4	4	6	6	6	4
24	2	3	1	-2	3	1	2	3	3	3	3	3	4	4	4	4	4	4	4	4	4	4	4	4	4	4
25	3	4	1	3	-2	4	1	7	7	7	7	7	7	7	7	7	7	7	7	7	7	7	7	7	7	7
26	2	3	2	3	5	2	1	6	5	4	3	5	3	6	6	5	5	2	4	5	3	5	6	6	6	6
27	2	4	1	-2	1	1	1	5	4	4	4	4	4	5	5	5	4	4	4	4	4	4	4	6	6	7
28	4	4	2	5	5	4	1	6	6	6	6	6	6	6	4	4	7	6	4	6	6	6	6	6	6	6
29	1	3	1	5	2	1	2	2	1	1	1	1	1	4	1	1	1	1	5	6	2	2	6	2	5	1
30	4	1	2	2	-2	5	1	6	4	4	4	6	6	6	7	6	6	6	4	6	6	6	6	6	4	3
31	5	3	2	3	-2	4	1	4	4	5	4	4	4	4	4	4	6	5	4	5	5	4	5	5	4	4
32	2	3	2	2	-2	2	1	5	4	4	4	4	4	2	2	4	6	5	4	4	5	5	4	6	5	4
33	2	4	2	2	2	1	1	5	5	6	3	3	2	2	2	3	4	5	3	6	6	6	6	5	5	5
34	2	4	2	3	5	5	1	5	4	5	4	5	4	3	5	4	5	5	3	5	4	4	4	4	4	4
35	3	4	2	2	4	4	1	4	2	3	4	3	2	4	5	4	4	4	5	3	5	5	6	6	6	5
36	2	3	1	-2	2	1	2	5	4	6	6	4	2	5	5	4	4	4	4	4	4	5	6	5	5	5
37	2	3	1	4	5	2	1	4	3	5	4	4	3	2	2	1	3	6	2	3	5	6	7	6	3	3
38	2	4	2	-2	3	1	2	5	4	5	4	4	4	3	6	4	3	3	2	4	4	4	6	7	7	7
39	2	2	2	3	5	2	1	5	4	6	5	5	5	3	4	4	5	5	4	4	5	4	6	6	3	4
40	2	4	2	3	3	5	1	4	3	4	4	4	4	3	3	2	6	5	4	5	5	5	4	5	6	5
41	2	4	1	-2	4	1	1	5	7	3	4	5	7	4	6	6	6	7	3	6	3	3	3	3	3	4
42	2	4	1	-2	1	1	1	5	4	4	4	3	4	5	6	4	4	4	4	4	5	5	4	5	7	7
43	3	3	1	3	-2	2	2	6	4	4	6	4	4	1	1	2	5	5	4	5	5	5	6	5	4	3
44	1	3	2	3	2	1	1	2	2	2	2	2	2	4	2	1	4	3	2	1	2	4	6	5	7	6
45	2	1	2	2	3	2	1	5	4	4	4	4	4	4	4	4	4	4	4	4	4	4	4	4	4	4
46	3	2	2	2	-2	3	2	4	4	4	4	4	4	2	4	2	6	4	4	4	4	4	6	6	6	6
47	1	3	2	-2	2	1	2	7	6	5	4	5	4	5	5	5	6	5	6	6	6	5	6	7	6	6
48	1	3	2	-2	2	1	2	4	4	4	2	4	4	2	2	4	4	2	4	6	6	6	4	6	6	4
49	2	4	2	1	3	1	2	3	3	4	2	2	2	5	3	3	3	2	2	2	2	3	6	6	6	6
50	3	4	1	3	3	5	2	3	1	2	3	3	3	3	3	3	3	3	3	3	3	3	4	4	5	5
51	5	4	2	2	2	4	2	2	2	2	2	2	2	4	2	2	3	3	4	3	6	6	4	6	4	2
52	1	3	2	2	3	1	1	5	4	4	4	4	3	5	5	5	4	4	4	4	4	4	4	5	4	4
53	2	3	1	1	4	1	1	5	4	4	3	2	2	2	4	2	4	4	2	3	3	2	4	5	7	5
54	2	3	2	-2	2	1	2	5	5	4	6	5	5	4	7	7	7	5	6	6	7	6	4	7	6	4
55	2	3	1	1	-2	3	1	4	4	4	4	4	4	6	4	5	5	5	3	6	6	6	6	6	5	4
56	2	3	2	1	2	1	1	5	4	4	5	5	5	3	5	4	5	5	4	4	4	4	6	6	4	4
57	2	3	2	1	2	1	2	5	4	4	4	4	4	4	4	4	4	4	4	4	4	4	4	5	4	4
58	2	3	2	2	3	1	2	4	4	5	5	4	5	6	6	3	3	5	6	6	5	6	5	6	5	5
59	1	3	1	-2	2	1	2	4	4	4	3	4	4	4	4	4	4	5	4	4	4	4	4	4	4	4
60	2	3	2	-2	3	1	1	4	3	4	5	5	3	6	6	4	5	3	4	6	4	6	6	6	7	7
61	1	3	2	5	1	1	2	3	2	3	2	2	2	2	2	2	2	2	2	2	2	2	2	2	2	2
62	2	3	2	2	1	1	1	4	4	4	4	4	4	4	5	4	4	5	4	4	4	4	4	4	5	5
63	2	3	2	1	2	1	1	5	4	7	3	3	3	5	5	3	5	5	3	3	5	6	6	6	7	6
64	3	3	2	2	-2	5	1	4	4	5	4	4	5	4	5	4	5	5	5	5	5	4	6	5	5	4
65	2	1	2	2	3	2	1	4	4	4	4	4	4	4	4	4	4	4	4	4	4	4	4	4	4	4
66	2	3	1	1	2	1	1	4	2	3	3	3	3	3	2	2	3	5	4	3	3	3	5	5	6	4
67	1	3	1	2	2	1	2	3	1	1	1	1	1	1	1	1	1	1	1	1	1	1	1	1	1	1
68	2	3	2	-2	4	1	1	4	4	4	3	3	3	3	4	3	3	3	2	3	3	3	4	4	5	4
69	1	3	2	-2	2	1	2	4	4	4	4	4	4	4	4	4	4	4	4	4	4	5	5	6	6	4
70	3	2	2	1	1	5	1	6	4	4	4	4	4	4	4	4	4	4	4	4	4	4	4	4	4	4
71	2	3	2	3	2	1	1	7	6	6	6	6	6	5	7	7	7	7	7	7	7	7	7	7	5	6
72	2	3	2	1	3	1	1	4	3	3	6	5	4	2	6	2	7	6	3	6	6	6	7	7	6	6
73	2	3	2	3	4	1	2	1	1	1	1	1	1	3	4	6	6	7	1	3	5	2	7	5	7	5
74	2	3	2	2	2	1	1	4	4	4	4	4	4	4	4	4	4	4	4	4	4	4	5	6	5	5
75	1	2	2	-2	3	1	1	4	4	4	4	4	4	5	5	4	4	5	4	5	5	5	5	5	5	5
76	1	3	2	2	2	1	2	4	4	4	4	4	4	4	4	3	3	3	3	3	3	3	2	5	5	5
77	2	3	2	1	3	1	2	5	5	2	2	3	5	2	5	5	6	5	4	5	5	5	7	6	6	4
78	4	1	1	2	3	5	2	5	4	4	3	4	3	5	6	3	6	6	6	6	6	6	3	6	6	6
79	5	1	2	1	3	2	2	3	4	4	4	4	3	6	5	5	5	5	5	5	5	4	4	6	5	4
80	2	3	2	2	5	2	1	7	4	4	3	5	4	2	4	4	6	6	4	4	4	5	7	7	7	6
81	2	3	2	2	2	1	2	6	6	6	5	5	5	4	4	6	6	6	6	6	6	7	6	6	5	5
82	2	1	1	1	-2	5	2	4	4	4	4	4	4	4	4	4	4	4	4	4	4	4	4	4	4	4
83	2	3	1	-2	5	1	2	4	4	4	4	4	4	4	4	4	4	4	4	4	4	4	4	4	4	4
84	2	3	1	2	3	1	2	4	4	4	3	4	3	4	5	6	3	3	2	2	2	2	5	7	6	6
85	2	3	2	2	5	1	1	5	4	4	4	4	4	4	4	4	4	4	4	4	4	4	4	4	5	5
86	1	3	2	5	3	1	1	7	6	6	6	4	5	6	4	5	5	6	5	5	4	6	5	5	5	6
87	3	1	2	1	3	5	1	5	5	5	4	4	3	5	5	5	4	4	4	2	3	4	5	6	5	3
88	2	4	1	-2	4	1	2	4	3	5	2	4	2	6	6	3	3	3	1	3	5	2	5	3	6	3
89	3	2	1	3	5	2	1	4	4	4	5	5	5	4	5	4	5	5	4	5	5	5	7	7	5	6
90	1	3	2	-2	5	1	2	3	3	3	4	4	3	3	3	3	3	3	3	3	3	3	2	4	6	6
91	2	3	2	2	3	1	2	3	4	3	2	2	4	4	4	3	3	3	2	3	3	4	4	6	7	7
92	2	3	2	1	3	1	2	3	4	5	4	4	4	4	6	4	4	4	4	4	4	4	4	4	4	4
93	2	3	2	-2	2	1	2	4	4	4	4	4	4	6	6	4	4	4	5	5	4	4	4	5	5	5
94	2	4	1	1	2	1	2	4	4	4	4	4	6	4	5	5	5	5	5	5	5	5	6	1	6	5
95	2	3	1	1	2	1	2	3	2	4	1	1	1	5	5	4	1	1	1	2	2	3	3	3	7	7
96	2	3	1	-2	2	1	2	2	1	2	2	1	1	4	2	1	2	2	2	2	2	2	4	4	7	7
97	2	3	2	1	2	2	1	6	6	6	3	3	4	6	6	4	4	4	4	4	4	4	6	6	4	4
98	2	3	2	1	4	5	2	6	5	6	5	5	5	5	5	5	5	5	5	5	5	5	5	5	5	5
99	4	2	2	3	5	5	1	5	4	4	4	4	4	4	4	3	4	4	4	4	4	4	5	5	5	4
100	3	3	1	3	-2	2	2	6	4	4	4	4	4	2	4	2	4	6	4	5	5	5	6	6	5	5
101	2	3	1	2	2	1	2	3	3	5	6	5	5	5	5	6	4	5	5	5	6	6	6	5	6	5
102	3	3	2	3	3	3	1	2	2	2	1	4	3	4	5	5	5	5	5	5	5	6	5	6	6	6
103	1	3	2	-2	4	1	2	3	3	4	4	4	4	5	4	3	4	5	3	6	5	6	6	6	5	5
104	2	3	2	2	5	5	1	6	4	6	6	6	4	6	6	4	6	6	6	6	6	6	6	6	4	4
105	2	3	1	-2	2	1	2	6	5	5	4	4	4	6	5	5	4	4	3	4	4	3	5	6	5	5
106	2	3	2	2	5	2	1	3	3	2	1	3	4	4	3	6	5	5	4	4	1	6	6	6	7	7
107	2	3	2	-2	2	1	1	5	4	4	6	5	2	4	4	4	5	6	4	4	4	4	6	7	4	4
108	2	4	2	3	2	1	1	5	4	5	6	6	6	2	4	3	6	6	4	6	4	4	6	6	2	6
109	2	4	2	-2	2	1	2	3	3	4	4	4	4	2	3	3	3	4	2	4	3	3	3	4	5	5
110	5	5	1	5	5	2	1	5	7	7	6	4	4	4	4	4	4	4	4	4	4	4	4	4	4	4
111	3	4	2	2	2	4	1	7	6	6	6	6	6	7	7	7	7	7	7	7	7	7	7	7	2	2
112	2	4	1	-2	3	1	2	4	3	2	2	2	2	2	2	2	3	2	2	2	2	2	4	5	6	5
113	2	4	2	1	2	1	2	4	4	5	4	4	4	5	5	6	4	4	4	4	3	5	6	6	6	7
114	2	3	2	1	2	1	1	4	4	4	5	5	4	4	4	4	4	4	4	4	5	5	5	5	5	5
115	2	4	1	2	1	1	2	6	6	6	6	6	6	6	6	6	6	5	5	6	6	6	6	6	3	3
116	2	4	1	3	2	1	2	4	4	4	4	4	4	2	5	4	6	5	2	3	3	6	6	7	5	5
117	2	3	1	-2	2	1	2	6	4	3	4	4	5	1	1	1	6	5	3	4	5	4	6	6	4	4
118	2	3	1	2	-2	2	1	5	4	3	2	2	2	6	6	6	5	5	5	6	7	7	6	6	7	6
119	2	3	2	1	2	1	2	4	2	2	2	2	2	2	3	4	3	4	4	4	4	4	5	4	6	5
120	2	4	2	-2	5	1	1	5	5	4	5	4	4	6	5	3	6	4	3	4	6	4	6	6	5	4
121	3	2	2	2	2	5	1	6	6	6	6	6	6	6	6	6	6	6	6	6	4	6	6	6	5	5
122	4	3	1	4	-2	2	2	4	4	3	3	5	4	5	3	5	5	4	3	4	4	4	4	4	5	5
123	3	2	1	3	4	2	1	6	6	6	4	6	6	6	6	6	6	6	4	6	6	6	6	6	4	4
124	2	4	2	2	5	1	2	5	4	4	6	4	5	3	4	4	4	5	3	3	3	2	3	5	5	3
125	2	1	1	2	-2	2	1	4	4	4	6	4	7	4	6	4	7	6	6	7	7	7	6	5	6	6
126	2	3	2	-2	2	1	1	5	3	6	3	5	2	5	5	5	2	4	4	6	4	3	5	5	4	4
127	2	4	2	1	5	1	1	7	7	7	7	7	7	4	4	5	7	7	4	5	5	7	7	7	7	7
128	2	3	2	2	-2	2	2	2	2	2	2	2	2	2	2	2	2	2	2	2	2	2	6	6	7	7
129	3	4	1	2	2	5	2	5	2	3	4	4	4	5	5	7	5	5	4	5	5	5	5	6	6	6
130	2	3	1	3	2	1	1	6	4	3	5	5	3	2	5	4	6	4	2	4	4	4	6	6	4	4
131	2	3	2	1	2	1	1	3	2	1	4	4	4	6	5	4	4	4	4	4	4	4	7	5	5	5
132	2	4	2	1	3	1	1	4	4	4	4	4	4	4	4	4	4	4	4	4	4	4	4	4	4	4
133	2	4	2	-2	3	1	1	3	4	3	3	3	4	5	4	5	5	3	1	4	4	4	4	5	5	6
134	2	3	2	1	3	3	2	4	4	4	4	4	4	5	5	4	5	5	4	4	4	4	5	5	4	4
135	1	3	2	1	3	1	2	4	4	4	3	4	4	6	5	2	2	2	2	2	2	5	5	5	6	4
136	2	3	2	1	3	1	2	4	3	5	2	3	5	3	7	2	5	4	4	4	4	4	7	6	7	7
137	2	3	1	-2	2	1	2	6	4	5	4	4	4	4	4	3	5	5	5	5	5	5	5	5	5	5
138	2	3	2	2	2	2	2	4	4	3	3	3	4	4	3	2	5	5	4	4	4	4	6	6	6	4
139	3	3	2	4	5	2	2	3	2	3	3	4	3	5	5	4	4	4	3	4	4	4	6	6	7	7
140	3	3	2	2	4	4	1	4	4	4	4	4	6	6	6	4	4	4	6	4	4	4	7	7	5	6
141	2	4	2	-2	3	1	2	5	5	5	5	5	5	5	5	5	5	5	5	5	5	5	6	5	6	6
142	2	3	2	-2	2	1	2	3	2	2	3	3	3	3	5	4	5	4	4	4	4	4	5	6	6	5
143	2	3	2	-2	2	1	1	5	4	5	4	4	3	3	4	5	6	5	1	3	2	4	7	7	7	4
144	2	4	2	-2	4	1	1	7	7	7	7	7	4	4	7	4	7	6	5	5	5	4	7	7	4	4
145	2	3	2	3	-2	2	1	7	7	7	7	7	7	4	5	4	4	5	2	5	6	5	7	7	5	4
146	2	3	2	3	-2	2	1	4	4	2	2	2	6	1	2	2	5	1	6	7	7	6	7	2	4	2
147	2	2	2	2	3	1	1	4	4	4	4	4	4	6	5	4	5	5	5	4	3	6	5	6	4	4
148	2	3	1	4	2	2	2	4	4	2	3	3	5	5	4	5	4	6	2	4	5	2	4	5	6	3
149	5	3	2	3	2	4	2	2	2	2	2	2	2	2	2	2	2	2	2	2	2	2	2	2	6	6
150	4	4	1	4	-2	2	2	4	4	5	3	3	3	1	5	2	3	3	3	4	4	6	6	7	6	5
151	2	3	2	2	3	3	2	4	4	4	4	4	3	3	3	3	4	4	3	4	4	4	4	5	6	6
152	2	3	1	3	-2	5	2	6	4	6	6	3	6	6	6	6	6	6	6	6	6	7	7	7	7	6
153	2	3	2	2	-2	3	2	3	4	4	3	3	3	6	5	4	4	5	6	5	4	5	7	7	6	3
154	2	3	1	4	-2	2	1	6	4	4	6	6	4	6	4	5	6	6	2	6	5	6	6	7	5	4
155	1	3	2	-2	2	1	2	4	4	4	4	4	4	4	4	4	4	4	4	4	4	4	4	4	4	4
156	2	4	2	1	5	1	1	3	3	3	3	4	3	2	5	3	3	3	3	3	3	3	6	6	6	6
157	3	3	2	2	2	3	1	4	4	4	4	4	4	5	7	5	6	6	6	6	5	5	6	6	5	3
158	2	3	2	2	3	3	2	4	4	4	4	3	3	5	5	4	5	5	5	5	4	4	4	5	5	5
159	4	1	1	3	3	3	2	4	4	4	4	4	4	4	4	4	4	4	4	4	4	4	4	4	4	4
160	2	3	2	2	5	2	2	5	4	5	4	4	1	5	4	4	6	6	6	6	4	2	3	3	7	4
161	2	3	1	3	-2	5	2	2	2	2	2	2	2	3	4	2	1	2	2	2	2	2	2	3	6	6
162	2	4	2	1	1	1	2	4	4	4	4	4	4	4	4	4	4	4	4	4	4	4	4	4	4	4
163	2	4	1	-2	3	1	2	6	4	4	4	4	4	6	6	4	6	6	6	6	4	6	5	6	6	6
164	2	4	1	-2	5	1	2	4	2	2	4	4	4	1	2	3	3	4	2	4	4	4	5	6	6	5
165	2	3	2	3	3	1	1	7	4	4	4	4	4	6	6	6	6	6	4	4	4	4	4	6	6	6
166	2	3	1	3	-2	2	1	6	4	4	4	5	4	5	5	6	5	6	4	5	4	5	6	6	4	3
167	2	4	1	4	2	1	2	4	4	4	3	3	3	5	5	4	5	4	4	4	4	4	6	6	6	6
168	1	2	2	1	2	1	2	4	4	4	4	4	4	4	4	4	4	4	4	4	4	4	4	6	5	5
169	2	4	2	3	2	2	1	6	6	6	6	6	6	6	7	7	7	7	5	6	6	6	7	7	4	4
170	2	3	2	2	2	1	2	4	4	4	4	4	4	3	5	4	3	5	5	5	5	4	5	5	6	5
171	3	1	2	1	1	5	2	4	4	5	6	5	5	4	5	6	5	6	4	6	5	5	6	4	5	5
172	2	3	2	2	-2	2	1	7	7	7	4	5	4	5	5	5	6	5	3	5	4	4	6	7	5	5
173	2	2	1	2	1	4	2	6	4	6	5	5	5	6	6	5	6	6	6	6	6	7	7	7	6	6
174	2	4	2	-2	2	1	2	3	1	2	2	2	2	4	6	3	4	4	3	4	6	6	6	6	7	7
175	2	2	1	5	-2	5	2	3	1	4	4	4	4	4	4	4	4	4	4	4	4	4	4	4	4	4
176	2	3	2	1	1	1	2	3	3	3	3	4	4	5	4	3	6	5	4	5	6	6	6	5	5	5
177	2	4	2	1	3	1	1	1	4	5	4	4	3	6	6	5	5	5	6	5	5	5	5	6	5	4
178	4	2	2	2	5	5	1	7	7	7	7	7	7	7	7	7	7	7	7	7	7	7	7	7	6	4
179	2	3	2	2	3	3	1	5	4	5	5	5	4	5	5	4	6	6	3	5	4	4	6	6	4	4
180	2	4	1	1	2	1	2	4	4	4	4	4	4	2	5	3	3	4	4	4	4	4	4	4	6	5
181	5	2	1	2	5	2	2	2	2	2	2	4	4	4	4	4	4	4	4	4	4	4	5	6	4	4
182	2	3	2	2	2	1	1	5	4	2	4	4	4	5	5	4	4	4	5	4	4	5	5	5	5	5
183	3	4	2	2	5	2	2	4	4	4	3	3	4	5	5	4	5	5	5	5	5	5	5	5	4	4
184	2	3	2	-2	2	1	2	3	1	2	2	2	2	2	4	2	4	2	2	3	2	3	2	4	5	5
185	2	3	1	2	3	2	2	6	4	3	2	2	2	4	4	3	3	3	3	3	4	6	5	5	7	6
186	2	3	1	1	2	5	2	3	3	3	3	3	3	4	4	4	4	4	4	4	4	2	4	4	6	6
187	2	4	1	2	-2	2	2	4	2	4	4	4	4	4	4	4	5	4	3	4	4	6	6	6	6	6
188	2	3	1	2	2	2	2	3	3	6	3	1	1	4	6	3	6	4	4	6	2	5	7	7	7	6
189	2	3	2	1	2	1	2	5	3	4	4	4	4	4	5	5	4	4	4	4	4	4	4	5	5	5
190	2	3	2	-2	3	1	1	6	4	4	4	4	4	5	4	5	5	5	4	4	4	4	5	6	6	6
191	2	4	2	3	5	1	2	6	6	7	4	4	4	3	6	4	4	6	3	4	6	6	6	7	5	3
192	1	4	1	2	4	2	2	1	3	5	2	6	1	7	3	5	4	2	4	2	2	6	5	6	3	4
193	2	3	2	1	2	1	1	4	4	3	3	4	4	4	4	4	4	3	3	4	4	4	5	6	4	4
194	2	3	2	-2	2	1	2	5	2	4	4	4	4	5	3	3	3	5	5	4	4	5	5	4	7	6
195	3	1	2	3	3	5	1	5	4	4	5	4	5	4	7	4	6	6	6	6	6	6	6	7	6	4
196	2	4	2	1	2	1	1	6	4	4	4	5	5	5	5	5	6	6	4	5	4	6	6	6	4	4
197	4	4	1	5	5	2	1	5	4	4	6	5	5	6	6	6	6	6	6	6	6	7	7	7	4	4
198	2	4	2	3	1	1	2	5	4	5	4	4	4	4	5	4	4	4	3	2	2	4	6	5	6	6
199	2	3	2	-2	3	1	1	5	4	4	5	5	4	4	4	6	5	5	5	5	6	6	7	7	6	7
200	2	4	2	1	2	1	2	5	5	5	3	3	2	2	4	4	4	4	3	4	4	4	5	6	5	6
201	4	4	1	4	-2	2	2	2	2	2	2	2	2	4	5	4	2	3	2	1	3	5	5	5	5	5
202	2	3	2	2	2	1	2	6	4	4	5	6	6	6	7	6	6	6	6	6	6	6	6	7	7	7
203	2	3	1	2	1	3	1	6	5	4	2	6	4	7	2	3	7	2	4	3	6	6	7	7	7	7
204	2	3	1	2	2	2	1	6	4	6	4	4	2	3	6	2	4	6	2	4	4	3	6	6	5	6
205	1	3	2	-2	2	1	1	4	4	4	6	6	6	4	4	5	6	5	5	6	6	6	6	6	6	4
206	2	3	2	2	4	5	2	6	4	6	6	6	4	6	6	6	6	6	6	6	6	6	6	6	6	6
207	2	4	1	-2	3	1	2	5	5	4	3	4	2	5	6	6	6	6	6	6	6	6	6	6	6	6
208	2	4	2	4	4	1	1	4	4	4	5	4	5	3	4	3	6	5	5	4	4	5	5	5	3	3
209	2	3	2	2	2	1	2	7	7	7	5	4	3	7	7	7	7	3	6	6	5	2	7	6	7	1
210	2	3	2	3	2	1	1	6	5	6	4	6	4	4	7	6	7	7	6	6	6	4	6	7	6	5
211	2	3	1	2	2	1	1	6	4	3	3	3	5	2	5	3	5	5	4	5	5	5	4	5	4	4
212	2	3	1	3	4	1	1	4	4	5	4	4	3	3	5	3	5	5	2	2	3	3	6	6	6	6
213	2	3	2	-2	4	1	2	4	4	4	4	4	4	3	4	4	4	4	2	4	4	4	4	4	6	3
214	2	3	2	1	2	1	2	3	2	4	3	3	3	4	5	3	6	5	5	6	6	6	6	6	6	6
215	2	2	1	3	-2	5	2	1	1	1	1	1	1	1	1	1	1	1	1	1	1	1	1	1	1	1
216	2	3	2	3	4	1	2	4	2	2	3	4	3	5	4	3	6	6	5	5	3	3	4	6	7	7
217	2	3	1	2	2	1	2	2	3	2	4	3	3	3	3	3	4	4	4	4	3	3	4	5	3	5
218	2	4	2	2	2	1	1	6	5	5	4	4	3	6	6	5	3	5	2	2	4	4	6	6	6	4
219	2	3	1	5	1	5	2	3	2	3	2	2	3	3	3	2	3	3	3	4	4	4	4	5	5	4
220	1	5	2	5	5	2	2	2	7	5	4	7	3	6	2	6	4	6	6	5	5	6	3	4	4	3
221	5	1	2	1	-2	2	2	6	4	6	4	4	2	4	4	4	6	4	6	6	4	4	4	4	5	5
222	2	3	2	2	2	1	1	4	4	4	3	2	4	2	4	2	3	4	4	4	4	4	4	6	6	4
223	2	4	1	-2	2	1	1	6	5	4	4	5	4	6	6	5	5	5	4	5	5	5	6	6	5	3
224	2	3	2	-2	3	1	2	5	5	4	4	3	4	2	6	4	5	6	4	5	6	6	6	6	6	6
225	2	4	2	1	4	1	2	5	4	5	5	5	5	5	5	5	5	5	5	5	5	5	5	6	6	6
226	2	3	2	1	3	1	2	4	4	4	6	5	6	3	4	4	4	6	4	4	6	6	4	6	4	5
227	1	3	1	1	3	1	2	4	4	5	5	5	5	4	4	4	6	5	4	6	5	4	5	7	5	5
228	2	3	2	3	2	1	1	5	5	5	4	4	4	5	5	5	5	5	5	5	5	5	5	5	5	5
229	3	4	1	3	-2	2	2	7	4	6	4	4	5	5	6	5	6	6	3	4	5	4	6	6	6	3
230	2	4	2	1	2	1	2	3	3	3	3	3	3	3	5	3	5	3	3	3	3	3	5	6	5	4
231	2	3	2	-2	3	1	1	4	4	3	4	4	4	5	2	5	6	7	4	5	5	5	7	7	2	6
232	2	3	2	1	3	1	2	4	2	4	3	3	3	3	3	3	3	3	2	2	3	4	4	5	6	6
233	2	4	2	2	-2	4	1	6	4	2	6	4	1	6	7	6	4	4	7	4	2	4	6	7	6	4
234	2	3	1	2	2	2	1	5	4	5	4	4	4	6	6	7	5	5	4	4	4	4	4	5	5	4
235	3	4	2	4	-2	2	1	6	6	6	4	5	5	4	5	5	6	5	4	5	5	5	6	6	5	5
236	2	3	2	-2	3	1	2	3	5	6	5	4	4	6	6	6	5	4	3	5	4	5	6	6	5	5
237	2	4	2	2	-2	2	1	3	3	3	3	3	2	3	5	5	5	5	3	5	4	5	6	6	5	4
238	3	4	1	3	-2	5	2	4	4	5	5	4	4	3	5	4	6	6	6	6	5	5	6	7	5	5
239	1	3	2	1	2	1	2	4	4	5	4	4	4	4	5	4	4	4	4	4	4	4	4	5	5	5
240	3	1	1	1	3	5	2	1	4	4	4	4	4	6	4	5	4	6	6	4	6	6	6	6	7	6
241	1	2	1	2	2	2	1	5	4	5	4	4	4	4	5	5	5	3	4	4	4	4	4	4	4	4
242	2	3	1	2	1	2	1	3	3	2	2	2	2	4	6	6	4	3	2	3	3	3	2	7	5	6
243	2	3	1	5	3	1	2	6	4	4	6	6	6	6	6	6	6	6	6	6	6	6	6	6	6	6
244	2	2	1	2	1	5	2	7	7	7	7	7	7	7	7	7	7	7	7	7	7	7	7	7	7	7
245	3	1	2	2	4	5	2	4	4	4	4	4	4	4	4	4	4	4	4	4	4	4	4	4	4	4
246	3	4	2	2	-2	2	1	5	5	5	4	4	4	6	6	5	5	5	3	6	5	4	5	5	5	3
247	1	3	2	3	4	1	1	5	5	3	3	3	4	5	6	4	6	5	4	5	5	5	6	7	6	6
248	2	4	2	-2	-2	2	1	4	4	4	4	5	4	3	5	3	5	5	5	5	4	4	4	5	3	4
249	2	4	2	3	2	1	2	3	2	4	2	2	2	2	2	2	2	2	2	5	3	3	6	6	6	6
250	5	1	1	2	1	5	2	6	6	6	6	6	6	6	6	6	6	6	6	6	6	6	6	6	2	2
251	3	4	2	2	2	2	1	6	4	4	2	3	3	6	6	4	4	3	3	6	3	4	6	2	6	7
252	3	4	2	3	5	1	2	4	4	4	4	4	4	4	4	4	4	4	4	4	4	4	4	4	4	4
253	2	2	1	2	5	5	1	3	4	4	3	3	3	2	2	2	4	4	4	4	4	4	4	4	6	6
254	2	3	2	-2	3	1	2	4	4	4	4	4	4	4	4	4	4	4	4	4	4	4	4	4	4	6
255	2	3	1	2	3	5	2	5	5	5	5	4	4	5	5	4	5	5	4	6	5	4	6	6	6	6
256	3	3	2	1	1	5	2	4	3	5	3	5	3	2	4	2	6	6	4	6	5	7	7	7	6	6
257	2	3	1	5	2	1	1	4	4	4	4	4	4	4	4	4	4	4	4	4	4	4	4	4	4	4
258	2	3	1	3	2	2	2	3	3	3	6	6	6	6	6	6	6	6	6	6	6	6	6	6	6	6
259	5	5	2	5	5	5	2	1	1	1	1	1	1	1	1	1	1	5	5	6	4	2	3	1	1	6
260	2	3	1	2	-2	2	2	3	1	3	3	3	4	4	4	4	4	4	4	4	4	4	4	4	4	4
261	2	1	1	3	5	5	2	5	4	5	5	5	5	6	5	5	6	6	5	6	6	6	6	6	3	5
262	2	3	1	3	-2	2	2	5	5	5	5	5	5	5	5	5	5	5	5	5	5	5	5	5	5	5
263	2	3	1	2	5	2	1	4	4	4	3	3	3	5	5	5	3	4	2	4	2	4	5	5	5	4
264	2	4	2	1	2	1	2	6	5	5	2	2	3	5	5	5	5	2	2	6	6	5	6	6	7	7
265	2	4	2	2	2	1	1	4	1	4	2	2	3	3	3	3	3	3	3	3	3	4	7	7	7	7
266	2	3	2	2	-2	2	2	2	2	2	2	2	2	2	2	2	2	2	2	2	2	2	2	2	6	6
267	2	4	2	-2	2	1	2	4	4	4	3	2	4	5	7	4	5	6	4	5	7	5	7	7	7	7
268	2	3	2	-2	2	1	2	6	5	6	4	4	4	5	6	4	4	4	5	3	4	4	7	7	6	6
269	3	4	1	4	3	1	2	2	2	2	4	4	4	4	4	4	4	4	4	4	4	4	4	3	4	3
270	2	3	2	1	2	1	2	5	4	5	3	5	4	5	6	5	4	4	5	4	4	4	5	5	5	5
271	3	1	2	2	2	2	2	3	2	3	2	2	2	4	5	4	4	3	4	6	6	6	3	5	4	5
272	2	4	2	3	3	1	2	3	4	4	3	4	5	2	5	3	6	6	2	2	2	5	7	6	7	7
273	2	1	2	2	-2	2	2	4	2	4	3	3	4	4	3	4	4	4	4	6	6	4	4	6	4	4
274	2	4	2	-2	2	1	1	4	4	4	4	4	3	5	4	4	4	4	4	4	3	3	4	5	7	6
275	2	1	2	1	-2	5	2	4	4	4	4	4	4	4	4	4	5	4	4	4	4	5	4	5	5	5
276	2	3	2	-2	5	1	2	6	4	4	4	4	4	5	5	5	6	7	7	7	6	6	6	6	6	4
277	2	3	2	3	3	1	1	6	4	6	5	5	4	6	6	6	4	5	3	4	4	4	5	6	6	6
278	2	3	2	1	3	5	2	4	4	4	4	4	4	4	4	4	4	4	4	4	4	4	4	4	4	4
279	2	3	2	-2	2	1	1	6	5	6	5	5	5	6	7	5	5	4	4	4	4	3	7	7	5	4
280	3	3	1	3	2	2	1	6	4	4	4	4	4	1	3	1	3	3	1	3	4	3	5	5	4	5
281	2	3	2	1	2	1	1	3	1	4	4	5	3	1	5	2	5	6	4	6	6	3	6	6	6	4
282	2	4	2	1	4	1	2	4	4	5	4	4	3	3	3	3	3	4	4	3	3	4	6	6	6	6
283	2	3	2	1	4	1	2	4	4	6	4	4	4	4	5	4	5	5	4	5	4	4	5	6	4	4
284	3	4	1	1	3	1	2	6	4	6	4	4	3	5	5	4	5	5	4	3	3	4	5	6	4	4
285	2	3	2	1	2	1	2	1	1	4	4	4	4	5	5	4	5	4	6	6	4	3	3	6	6	6
286	2	3	1	2	5	2	2	6	4	4	6	6	6	1	6	4	6	7	7	6	6	6	7	6	7	4
287	4	3	1	3	5	5	2	4	3	5	4	4	3	5	5	5	3	3	2	4	4	4	5	6	6	4
288	2	4	1	2	3	1	1	4	4	4	4	4	4	7	6	4	5	6	4	4	4	4	4	6	4	4
289	2	3	2	-2	4	1	2	3	3	4	3	3	4	5	4	4	4	4	3	5	4	4	3	4	6	6
290	3	3	1	4	5	5	1	5	4	4	4	4	4	4	4	4	6	6	4	4	4	4	7	7	4	4
291	5	3	2	3	-2	4	1	3	5	6	3	3	3	4	4	4	4	4	4	5	5	4	5	5	6	6
292	2	3	2	1	2	1	2	6	6	7	6	6	6	6	7	7	6	6	6	6	6	6	4	7	6	6
293	2	3	2	2	-2	2	2	4	4	4	3	3	4	4	4	4	4	4	4	4	4	4	4	4	6	6
294	3	4	1	4	3	1	1	5	5	5	4	4	2	3	5	4	5	6	2	2	3	2	5	5	3	5
295	2	4	1	-2	3	1	1	6	6	5	6	6	4	6	6	6	5	5	4	4	4	5	5	6	4	5
296	3	4	2	3	1	1	1	3	3	1	1	1	1	5	3	3	2	2	2	2	2	5	2	5	6	6
297	2	4	2	-2	2	1	2	6	6	6	4	6	6	6	6	6	6	6	5	6	5	6	6	7	4	4
298	4	3	1	5	4	2	1	6	4	4	5	5	4	3	4	4	6	6	2	5	4	4	6	6	4	4
299	2	4	2	3	5	1	1	6	7	7	7	7	5	4	7	6	6	6	4	6	5	6	6	6	2	2
300	2	3	1	3	-2	2	1	7	6	3	2	4	4	3	5	4	6	6	4	4	4	4	6	7	5	6
301	3	3	1	2	2	1	2	3	4	4	4	4	4	4	4	4	4	4	4	4	4	4	4	5	5	4
302	2	4	2	1	2	1	2	4	4	3	5	5	5	5	6	5	6	3	2	4	4	5	6	6	5	4
303	3	4	1	3	1	1	1	6	6	6	5	5	5	5	5	5	5	5	5	5	5	5	5	6	4	4
304	2	4	2	2	3	1	2	4	4	4	3	3	3	2	4	3	4	4	4	4	4	4	4	4	5	5
305	3	1	1	5	5	2	1	7	6	6	6	6	6	4	4	6	5	5	5	4	5	4	5	5	5	5
306	1	2	2	1	2	1	2	4	4	4	4	4	4	4	4	4	4	4	4	4	4	4	4	4	4	4
307	2	2	2	1	2	1	2	4	4	4	5	4	4	4	6	4	4	4	4	4	4	4	4	4	4	4
308	1	2	2	1	4	1	1	6	6	6	6	6	6	6	6	6	6	6	6	6	6	6	6	6	6	6
309	1	2	2	4	3	1	1	6	4	4	4	4	4	4	4	4	4	4	4	4	4	4	4	4	4	4
310	1	2	2	2	3	1	1	6	6	7	7	7	7	6	6	6	6	6	6	6	6	6	6	6	2	3
311	1	2	2	-2	2	1	1	6	6	6	5	6	6	4	5	4	4	4	4	4	4	4	4	4	4	4
312	1	2	2	1	2	1	1	4	4	4	4	5	4	4	5	4	4	4	4	4	4	4	3	5	4	4
313	1	2	1	3	2	1	2	4	2	3	4	2	3	5	7	6	6	3	1	5	2	2	5	7	5	5
314	2	2	1	1	3	1	1	4	5	5	5	5	6	6	6	6	5	5	5	5	5	5	6	6	6	6
315	1	2	1	1	3	1	2	4	4	4	4	3	3	4	4	4	4	3	1	4	4	4	4	4	6	5
316	2	2	2	1	1	1	1	3	4	4	4	4	4	5	5	5	6	4	5	3	4	4	6	6	5	5
317	1	2	2	2	2	1	2	3	3	2	4	4	4	4	4	4	3	4	2	4	4	4	5	6	6	4
318	1	2	1	2	4	1	1	4	4	4	2	4	3	2	5	3	3	3	5	5	5	5	6	6	5	5
319	2	2	2	2	2	1	2	3	2	3	3	3	3	3	3	3	3	3	3	3	3	3	3	3	3	3
320	1	2	2	2	2	1	1	6	4	4	4	4	4	4	4	4	4	4	4	4	4	4	4	4	4	4
321	1	2	2	2	3	1	1	4	4	3	2	4	3	2	4	3	4	4	2	4	4	4	4	4	4	4
322	1	2	2	-2	-2	1	1	4	4	4	4	4	4	5	5	5	5	4	4	5	5	5	5	5	5	5
323	1	2	2	-2	-2	1	1	4	2	4	2	5	4	4	5	4	5	5	4	4	4	4	5	5	2	4
324	1	2	2	-2	3	1	1	3	3	3	3	3	3	3	6	3	6	3	6	6	3	4	5	6	6	5
325	2	4	1	3	3	1	2	4	1	4	4	4	4	4	5	4	4	4	4	4	3	4	4	4	4	4
326	4	3	2	2	-2	2	1	6	6	6	5	5	4	5	6	5	5	5	5	5	4	6	5	6	5	4
327	2	3	2	2	2	1	2	4	4	5	3	3	3	6	4	4	5	4	4	4	4	4	5	6	6	6
328	1	3	2	1	2	1	2	4	4	4	4	4	4	4	4	4	4	4	4	4	4	4	4	4	4	4
329	2	3	1	-2	2	1	1	4	4	5	5	5	4	4	5	4	3	5	5	6	5	6	5	5	6	5
330	5	3	1	2	1	2	1	4	4	4	6	6	6	4	4	4	6	6	4	6	6	6	3	6	4	4
331	2	4	2	-2	2	1	2	5	4	2	3	3	2	5	5	5	5	5	6	5	4	4	4	6	5	6
332	2	3	2	1	2	1	2	6	4	4	4	5	6	4	6	5	5	5	5	5	5	5	5	6	6	6
333	2	4	1	1	3	1	1	4	4	4	3	4	4	4	5	5	4	4	5	4	4	4	5	6	5	6
334	5	1	2	1	4	5	2	4	4	4	5	5	5	4	5	5	6	6	6	6	6	6	4	4	6	6
335	1	3	2	-2	2	1	1	5	4	4	3	3	3	3	6	4	6	3	4	3	3	4	6	6	6	6
336	2	3	2	3	1	1	2	4	4	4	7	7	7	5	4	4	4	6	6	6	6	6	4	6	6	6
337	1	3	2	2	3	1	2	6	4	4	4	4	5	2	2	4	6	3	4	4	4	3	3	4	4	6
338	2	3	1	-2	2	1	2	3	3	3	3	3	5	5	5	4	5	5	5	5	5	5	4	5	5	5
339	1	3	2	-2	2	1	2	2	2	2	2	2	2	4	2	2	4	4	2	3	3	3	5	4	7	6
340	1	3	2	-2	3	1	2	3	2	4	3	3	3	4	3	3	3	3	5	3	5	6	5	5	6	6
341	1	3	2	2	2	1	1	4	4	4	4	4	3	4	4	4	4	4	4	4	3	4	4	6	5	5
342	1	3	1	1	5	1	1	7	6	6	5	6	5	5	6	5	5	5	5	5	5	5	5	5	5	5
343	2	3	2	-2	3	1	2	5	4	3	3	3	6	6	6	4	6	5	2	3	4	4	6	7	2	6
344	1	3	2	-2	4	1	2	2	2	2	2	2	2	4	2	2	2	2	2	2	2	2	2	4	7	7
